# Supplementary material for: An inducible Cre mouse for studying roles of the RPE in retinal physiology and disease
Source: JCI journal article supplement (doi:10.1172/jci.insight.146604), 2021-03-30
Supplement: sd1 [file 1]

You are being redirected.
